# Supplementary material
Source: HighWire-hosted journal article supplement (https://jmg.bmj.com/content/58/8/534)

### gnomAD Loss-of-Function (LoF)-Intolerance

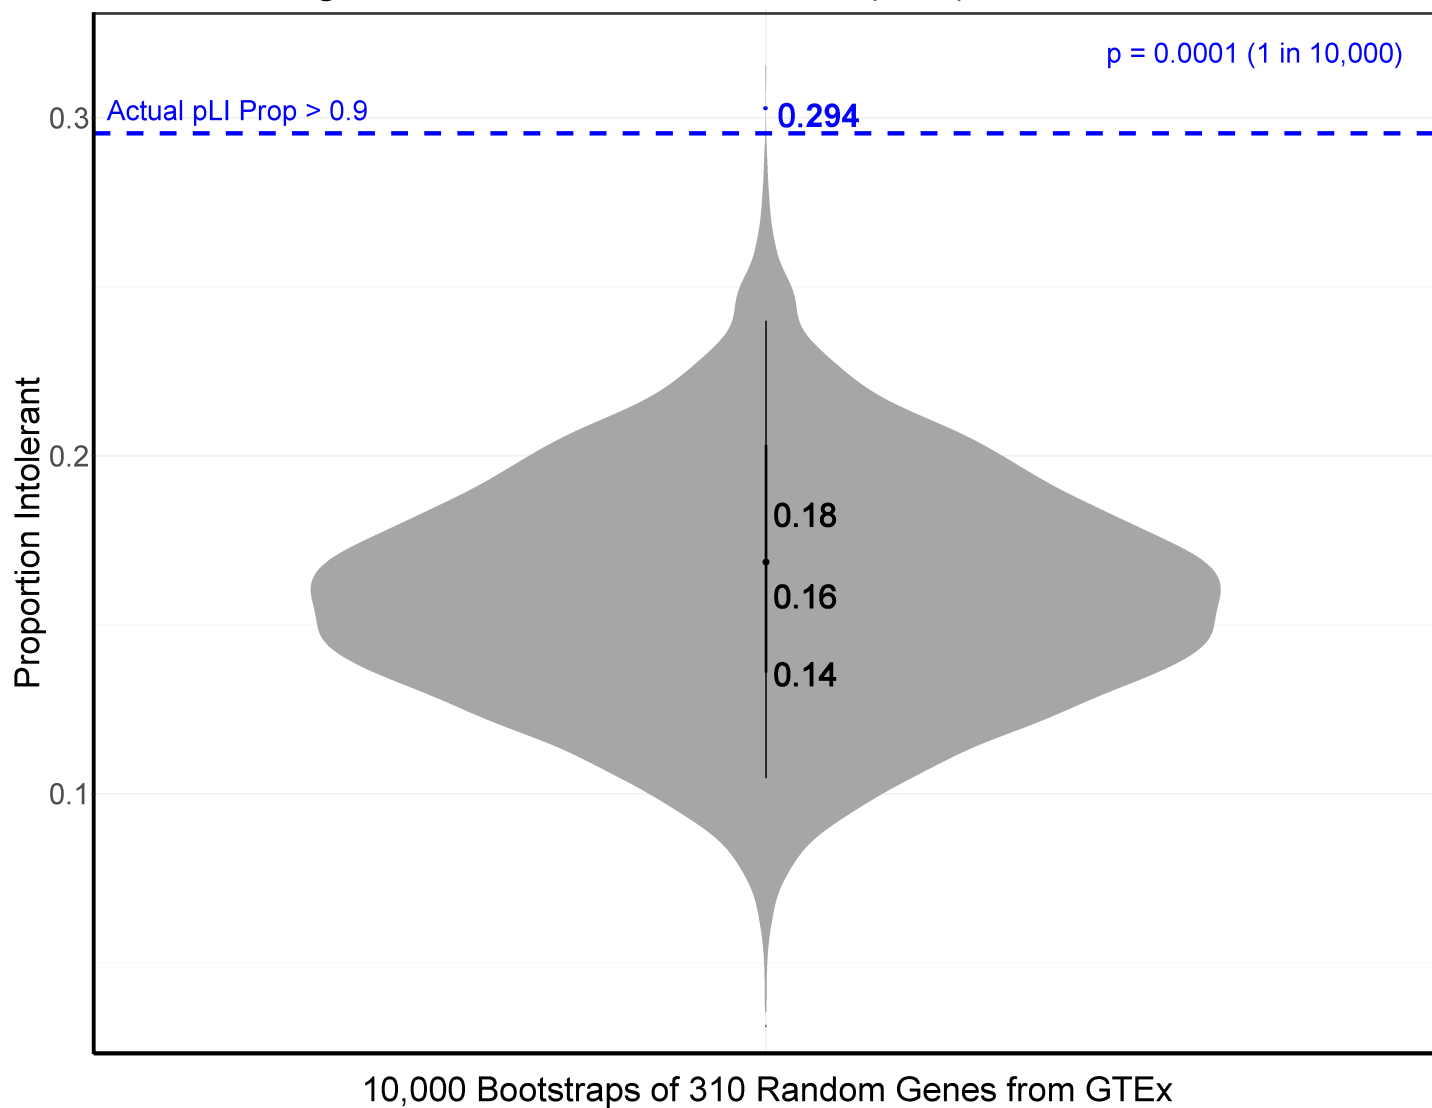

Supplement: inline-supplementary-material-4 [file inline-supplementary-material-4.pdf]
